# Supplementary material for: Molecular testing and treatment patterns for patients with advanced non-small cell lung cancer: PIvOTAL observational study
Source: PLoS One. 2018 Aug 27;13(8):e0202865. doi: 10.1371/journal.pone.0202865 (PMC6110501; doi:10.1371/journal.pone.0202865)
Supplement: S4 Table — (XLSX) [file pone.0202865.s005.xlsx]

## Sheet: S4 Table
														Source table: 14.1.7.2 and 14.1.8.2
	S4 Table. Biopsy-related characteristics for all 8 countries.
	Characteristic	Italy			Spain			Germany			Australia			Japan			Korea			Taiwan			Brazil
		(N = 174)			(N = 202)			(N = 139)			(N = 208)			(N = 175)			(N = 150)			(N = 217)			(N = 175)
		Squamous n=42	Nonsquamous n=121	Overall * N=174	Squamous n=33	Nonsquamous n=140	Overall * N=202	Squamous n=28	Nonsquamous n=108	Overall * N=139	Squamous n=30	Nonsquamous n=161	Overall * N=208	Squamous n=43	Nonsquamous n=129	Overall * N=175	Squamous n=30	Nonsquamous n=113	Overall * N=150	Squamous n=16	Nonsquamous n=201	Overall * N=217	Squamous n=35	Nonsquamous n=132	Overall * N= 175
	Patients with biopsy, n (%)	41 ( 98)	110 (91)	161 ( 93)	29 ( 88)	121 ( 86)	172 ( 85)	28 (100)	104 (96)	135 (97)	30 (100)	152 ( 94)	198 ( 95)	41 (95)	115 (89)	159 (91)	30 (100)	104 (92)	141 (94)	15 (94)	167 (83)	182 (84)	35 (100)	131 (99)	173 (99)
	No. biopsies per patient, mean (SD)	1.0 (0.22)	1.0 (0.19)	1.0 (0.19)	1.2 (0.5)	1.1 (0.4)	1.1 (0.4)	1.6 (1.0)	1.2 (0.5)	1.3 (0.7)	1.1 (0.35)	1.1 (0.39)	1.1 (0.38)	1.0 (0.16)	1.1 (0.47)	1.1 (0.41)	1.1 (0.35)	1.3 (0.49)	1.2 (0.45)	1.0 (0)	1.1 (0.4)	1.1 (0.38)	1.1 (0.3)	1.1 (0.3)	1.1 (0.3)
	Median (range)	1 (1-2)	1 (1-2)	1 (1-2)	1 (1-3)	1 (1-3)	1 (1-3)	1 (1-5)	1 (1-4)	1 (1-5)	1 (1-2)	1 (1-3)	1 (1-3)	1 (1-2)	1 (1-5)	1 (1-5)	1 (1-2)	1 (1-3)	1 (1-3)	1 (1-1)	1.0 (1-4)	1 (1-4)	1 (1-2)	1 (1-3)	1 (1-3)
	Overall number of biopsies	43	114	167	35	135	193	45	125	173	34	172	224	42	125	171	34	132	173	15	185	200	38	139	184
	Biopsy site, no. biopsies (%)	43	114	167	35	135	193	44	125	172	34	172	224	42	125	171	34	132	173	15	185	200	38	139	184
	Primary	34 ( 79)	91 (80)	133 ( 80)	31 ( 89)	96 ( 71)	146 (76)	36 ( 80)	105 ( 84)	144 ( 83)	25 ( 74)	97 ( 56)	136 ( 61)	36 ( 86)	108 ( 86)	146 ( 85)	24 ( 71)	91 ( 69)	119 ( 68)	14 (93)	128 (69)	142 ( 71)	23 ( 61)	92 ( 66)	118 ( 64)
	Metastatic organ (most common)	9 ( 21)	23 ( 20)	34 ( 20)	4 ( 11)	39 ( 29)	47 (24)	8 (18)	20 (16)	28 (16)	9 (27)	75 (44)	88 (39)	6 ( 14)	17 ( 14)	25 ( 15)	10 ( 29)	41 ( 31)	54 ( 31)	2 (4)	56 ( 34)	58 ( 29)	15 (40)	47 (34)	66 (36)
	Lung (other than primary site)	0	1 (1)	1 (1)	0	2 (2)	3 (2)	3 (7)	2 (2)	5 (3)	1 (3)	1 (1)	2 (1)	1 ( 2)	4 ( 3)	5 (3)	0	0	0	1 (7)	8 ( 4)	9 ( 5)	0	11 (8)	12 ( 6.5)
	Lymph nodes	2 (5)	9 (8)	11 (7)	1 (3)	16 ( 12)	18 ( 9)	4 (9)	7 (6)	11 (6)	4 ( 12)	38 ( 22)	44 (20)	3 ( 7)	4 ( 3)	7 (4)	8 ( 24)	25 ( 19)	34 (20)	0	10 (6)	10 (5)	8 ( 21)	13 ( 9)	23 ( 13)
	Brain	0	1 (1)	1 (1)	0	5 (4)	6 (3)	0	1 (1)	1 (1)	1 (3)	12 (7)	13 (6)	0	0	0	1 (3)	2 (2)	4 ( 2)	0	12 (7)	12 (6)	2 ( 5)	5 (4)	7 (4)
	Bone	2 (5)	4 (3)	6 (4)	0	5 (4)	5 (3)	0	2 (2)	2 (1)	2 (6)	8 (5)	10 (5)	0	1 (1)	1 (1)	0	5 (4)	5 (3)	0	8 (4)	8 (4)	1 ( 3)	6 ( 4)	8 ( 4)
	Liver	1 (2)	3 (3)	5 (3)	3 (9)	5 (4)	8 (4)	0	2 (2)	2 (1)	0	4 (2)	4 (2)	0	1 (1)	1 (0.6)	0	1 (1)	1 (1)	0	2 (1)	2 (1)	0	2 ( 1)	2 ( 1 )
	Size of excised tissue (cm2)
	Mean (SD)	1.6 (3.3)	1.8 (3.7)	1.6 (3.1)	3.6 (6.3)	2.1 (3.3)	2.3 (3.9)	1.2 (3.3)	1.6 (5.6)	1.5 (5.1)	0.7 (2.2)	0.5 (1.9)	0.5 (1.9)	0	0	0	2.9 (4.8)	1.9 (2.3)	2 (2.9)	0.08 (0.1)	0.60 (2.0)	0.51 (1.8)	1.8 (4.0)	1 (2.3)	1.2 (2.8)
	Median (range)	0 (0-9)	0 (0-12)	0 (0-12)	1 (0-20)	0.3 (0-15)	0.3 (0-20)	0.2 (0.02-17)	0.3 (0-48)	0.2 (0-48)	0.05 (0-11)	0.08 (0-17)	0.1 (0-17)	0	0	0	0.6 (1-14)	0.8 (0.1-8)	0.7 (0.01-14)	0 (0-0)	0 (0-15)	0.1 (0-15)	0.1 (0-15)	0.1 (0-15)	0.1 (0-15)
	Method of biopsy used, no. biopsies (%)
	Transbronchial biopsy or brush biopsy	19 (44)	24 (21)	46 (28)	9 (26)	37 (27)	55 (29)	5 ( 11)	42 ( 34)	47 ( 27)	9 (27)	27 (16)	40 ( 18)	29 ( 69)	64 ( 51)	95 ( 55.6)	10 ( 29)	27 ( 21)	37 ( 21)	4 (26)	32 (17)	36 (18)	9 ( 24)	23 ( 17)	33 ( 18)
	Fine needle biopsy	2 (5)	12 (11)	20 (12)	6 ( 17)	28 ( 21)	40 ( 21)	6 ( 13)	8 (6)	14 (8)	7 ( 21)	50 ( 29)	62 ( 28)	5 ( 12)	10 (8)	17 ( 9.9)	8 ( 24)	42 ( 32)	53 ( 31)	6 (40)	48 (26)	54 ( 27)	2 ( 5 )	19 ( 14)	22 ( 12)
	Direct biopsy	11 (26)	30 (26)	42 (25)	7 ( 20)	36 ( 27)	47 ( 24)	14 ( 31)	46 ( 37)	63 ( 36)	10 ( 29)	41 ( 24)	56 ( 25)	0	3 (2)	3 (1.8)	7 ( 21)	28 ( 21)	35 ( 20)	1 (7)	36 (19)	37 ( 18)	13 ( 34 )	54 ( 39)	68 ( 37)
	Endobronchial ultrasound or endoscopic ultrasound	6 (14)	16 (14)	22 (13)	3 (9)	11 (8)	15 (8)	10 ( 22)	14 ( 11)	24 ( 14)	3 (9)	20 ( 12)	23 ( 10)	4 (10)	18 ( 14)	22 (12.9)	4 ( 12)	14 ( 11)	18 ( 10)	3 (20)	24 (13)	27 ( 14)	7 ( 18)	10 ( 7)	18 (10)
	Surgery	2 (5)	15 (13)	17 (10)	3 (9)	7 (5)	11 (6)	6 ( 13)	9 (7)	15 (9)	1 (3)	20 ( 12)	21 ( 9)	1 (2)	5 (4)	6 (3.5)	2 (6)	14 ( 11)	18 ( 10)	1 (3)	32 ( 17)	33 ( 17)	6 ( 16)	22 ( 16)	31 ( 17)
	Other	1 (2)	7 (6)	8 (5)	3 (9)	9 (7)	12 (6)	3 (7)	5 ( 4)	8 (5)	4 ( 12)	12 (7)	17 (8)	3 (7.1)	25 ( 20)	28 ( 16.4)	3 (9)	6 ( 5)	11 ( 6)	0	13 (7)	13 (7)	1 (3)	8 (6)	9 (5)
	Unknown	1 (2)	7 (6)	8 (5)	4 ( 11)	7 (5)	13 (7)	1 (2)	1 (1)	2 (1)	0	2 (1)	5 (2)	0	0	0	0	1 (1)	1 (1)	0	0	0	0	3 (2)	3 (2)
	Reason for biopsy, no. biopsies (%)c
	For diagnosis	43 (100)	108 ( 95)	161 ( 96)	31 ( 89)	129 ( 96)	182 ( 94)	40 ( 89)	120 ( 96)	163 ( 94)	33 ( 97)	165 ( 96)	215 (96)	42 (100)	125 (100)	169 ( 99)	33 ( 97)	123 ( 93)	163 ( 94)	15 (100)	174 ( 94)	189 ( 95)	38 (100)	137 ( 99)	182 ( 99)
	For biomarker testing	10 ( 23)	31 ( 27)	49 ( 29)	5 ( 14)	37 ( 27)	47 ( 24)	0 (0)	41 ( 33)	42 (24)	0	24 (14)	28 ( 13)	2 ( 5)	17 ( 14)	20 (12)	1 ( 3)	17 (13)	18 ( 10)	1 (7)	58 (31)	59 (30)	0	18 ( 13)	18 (10)
	Other or unknown	0	3 (3)	3(2)	3 (9)	1 (1)	5 (3)	6 (13)	8 (6)	14 (8)	1 (3)	4 (2)	5 (2)	0	0	1 (1)	2 (6)	6 (5)	8 (5)	0	13 (7)	13 (7)	1 (3)	8 (6)	9 (5)
	Timing of biopsy, no. biopsies (%)	43	113	166	35	135	193	45	124	172	34	172	224	42	125	171	34	132	173	15	184	199	38	139	184
	Before diagnosis	38 ( 88)	100 ( 88)	145 ( 87)	27 ( 77)	113 ( 84)	161 ( 83)	37 ( 82)	110 ( 88)	150 ( 87)	31 ( 91)	154 (90)	201 (90)	41 ( 98)	116 ( 93)	159 ( 93)	30 ( 88)	114 ( 86)	151 ( 87)	12 (80)	122 (66)	134 ( 67)	35 ( 92)	116 ( 84)	158 (86)
	After diagnosis, Before 1L therapy	5 ( 12)	11 ( 10)	19 (11)	7 ( 20)	20 ( 15)	28 ( 15)	3 (7)	10 (8)	13 (8)	1 (3)	12 (7)	15 (7)	0	8 (6)	10 (6)	2 ( 6)	12 ( 9)	14 ( 8)	3 (20)	52 (28)	55 ( 28)	3 (8)	20 (14)	23 ( 13)
	After 1L therapy, Before 2L therapy	0 (0)	2 (2)	2 (1)	0 (0)	2 (2)	3 (2)	5 ( 11)	3 (2)	8 (5)	1 (3)	5 (3)	6 (3)	1 ( 2)	0	1 (1)	1 (3)	3 ( 2)	4 ( 2)	0	2 ( 1)	2 ( 1)	0	1 (1)	1 (1)
	After 2L therapy, Before 3L therapy	0 ( 0)	0 (0)	0 (0)	0 (0)	0 ( 0.0)	0 ( 0.0)	0	0	0	0	0	0	0	0	0	0	1 (1)	1 (1)	0	3 (2)	3 (2)	0	1 (1)	1 (1)
	After 3L therapy	0 (0)	0 (0)	0 (0)	1 ( 2.9)	0 ( 0.0)	1 ( 0.5)	0	1 (1)	1 (1)	1 (3)	1 (1)	2 (1)	0	1 (1)	1 (1)	1 (3)	2 ( 2)	3 (2)	0	5 ( 3)	5 (3)	0	1 (1)	1 (1)
	Missing	0	1	1	0	0	0	0	1	1	0	0	0	0	0	0	0	0	0	0	1	1	0	0	0
	Patients with rebiopsy, n (%)	2 (5)	4 (3)	6 (3)	5 ( 15)	12 (9)	18 (9)	10 (36)	18 (16.7)	28 (20)	4 (13.3)	17 (10.6)	23 (11)	1 (2)	5 (4)	7 (4)	4 (13)	26 (23)	30 (20)	0	14 (7)	14 (7)	3 (9)	6 (5)	9 (5)
	No. of rebiopsies	2	4	6	6	15	24	17	21	38	4	21	27	1	11	13	5	28	33	0	18	18	3	8	11
Reason for rebiopsy
	For diagnosis, no. biopsies (%)	2 (100)	2 (50)	4 (67)	3 ( 50)	12 ( 80)	17 ( 71)	12 (71)	16 (76)	28 (74)	3 (75)	16 (76)	20 (74)	1 (100)	11(100)	12 (92)	4 (80)	21 (75)	25 (76)	0	8 (44)	8 (44)	3 (100)	6 (75)	9 (82)
	For biomarker testing, no. biopsies (%)	0	3(75)	3 (50)	1 ( 17)	6 ( 40)	8 ( 33)	0	11 (52)	11 (29)	0	6 (29)	7 (26)	0	0	0	0	4 (14)	4 (12)	0	1 (6)	1 (6)	0	2 (25)	2 (18)
	Other or unknown, no. biopsies (%)	0	0	0	3 (50)	0	4 (17)	6 (35)	7 (33)	13 (34)	1 (25)	1 (5)	2 (7)	0	0	1 (7.7)	2 (40)	5 (18)	7 (21)	0	9 (50)	9 (50)	0	3 (38)	3 (27)
	In Australia, 5 squamous, 24 nonsquamous and 37 overall were missing size of biopsy tissue
	In Japan, no squamous, nonsquamous and overall collected any biopsy tissue
	In Korea, 22 squamous, 74 nonsquamous and 100 overall were missing size of biopsy tissue
	In Taiwan, 0 squamous, 11 nonsquamous and 11 overall were missing size of biopsy tissue
	In Brazil, 2 squamous, 26 nonsquamous and 29 overall were missing size of biopsy tissue
	In Italy, 34 squamous, 92 nonsquamous and 127 overall were missing size of biopsy tissue
	In Spain, 12 squamous, 51 nonsquamous and 73 overall were missing size of biopsy tissue
	In Germany, 2 squamous, 10 nonsquamous and 12 overall were missing size of biopsy tissue
	1L, 2L, 3L, first-, second-, third-line.
