# Supplementary material for: Molecular testing and treatment patterns for patients with advanced non-small cell lung cancer: PIvOTAL observational study
Source: PLoS One. 2018 Aug 27;13(8):e0202865. doi: 10.1371/journal.pone.0202865 (PMC6110501; doi:10.1371/journal.pone.0202865)
Supplement: S5 Table — (XLSX) [file pone.0202865.s006.xlsx]

## Sheet: S5 Table
S5 Table. Treatment patterns by predictive biomarker testing (EGFR mutation and ALK rearrangement) and mutation status, by NSCLC histology.
	Italy						Spain						Germany						Australia						Japan						Korea						Taiwan						Brazil
Among patients who got tested	Squamous		Nonsquamous		Overall		Squamous		Nonsquamous		Overall		Squamous		Nonsquamous		Overall		Squamous		Nonsquamous		Overall		Squamous		Nonsquamous		Overall		Squamous		Nonsquamous		Overall		Squamous		Nonsquamous		Overall		Squamous		Nonsquamous		Overall
Characteristic	EGFR+/ALK+	EGFR/ALK -/unknown	EGFR+/ALK+	EGFR/ALK -/unknown	EGFR+/ALK+	EGFR/ALK -/unknown	EGFR+/ALK+	EGFR/ALK -/unknown	EGFR+/ALK+	EGFR/ALK -/unknown	EGFR+/ALK+	EGFR/ALK -/unknown	EGFR+/ALK+	EGFR/ALK -/unknown	EGFR+/ALK+	EGFR/ALK -/unknown	EGFR+/ALK+	EGFR/ALK -/unknown	Australia	EGFR/ALK -/unknown	EGFR+/ALK+	EGFR/ALK -/unknown	EGFR+/ALK+	EGFR/ALK -/unknown	EGFR+/ALK+	EGFR/ALK -/unknown	EGFR+/ALK+	EGFR/ALK -/unknown	EGFR+/ALK+	EGFR/ALK -/unknown	EGFR+/ALK+	EGFR/ALK -/unknown	EGFR+/ALK+	EGFR/ALK -/unknown	EGFR+/ALK+	EGFR/ALK -/unknown	EGFR+/ALK+	EGFR/ALK -/unknown	EGFR+/ALK+	EGFR/ALK -/unknown	EGFR+/ALK+	EGFR/ALK -/unknown	EGFR+/ALK+	EGFR/ALK -/unknown	EGFR+/ALK+	EGFR/ALK -/unknown	EGFR+/ALK+	EGFR/ALK -/unknown
Syetemic therapy	N=0	N=1	N=18	N=60	N=22	N=66	N=0	N=12	N=19	N=93	N=24	N=121	N=1	N=4	N=20	N=50	N=21	N=55	N=2	N =1	N=29	N=86	N=31	N=97	N=1	N=16	N=46	N=64	N=49	N=81	N=1	N=5	N=48	N=53	N=53	N=59	N=0	N=2	N=126	N=57	N=126	N=59	N=0	N=2	N=12	N=58	N=13	N=61
First Line therapy n (%)	0	1 (100)	18 (100)	60 (100)	22 (100)	66 (100)	0	12 (100)	19 (100)	93 (100)	25 (100)	122 (100)	1 (100)	4 (100)	20 (100)	50 (100)	21 (100)	55 (100)	2	1	29 (100)	86 (100)	31	95	1 (100)	16 (100)	46 (100)	64 (100)	49 (100)	81 (100)	1 (100)	5 (100)	48 (100)	53 (100)	53 (100)	59 (100)	0	2 (100)	126 (100)	57 (100)	126 (100)	59 (100)	0	2 (100)	12 (100)	58 (100)	13 (100)	61 (100)
Platinum combination	0	1 (100)	7 (39)	58 (97)	8 (36)	64 (97)	0	8 (67)	10 (53)	87 (94)	12 (50)	110 (91)	1 (100)	4 (100)	13 (65)	47 (94)	14 (67)	52 (95)	0	1 (100)	15 (52)	79 (92)	15 (48)	87 (91.6)	1 (100)	11 (68.8)	4 (9)	56 (88)	5 (10.2)	68 (84)	1 (100)	5 (100)	24 (50)	48 (91)	28 (52.8)	54 (92)		1 (50)	9 (7)	20 (35)	9 (7)	21 (36)	0	2 (100)	8 (66.7)	57 (98.3)	8 (61.5)	60 (98.4)
non-platinum combination	0	0	0	0	0	0	0	0	2 (11)	0	2 (8)	0	0	0	0	0	0	0	0	0	0	0	0	0	0	0	0	0	0	0	0	0	0	1 (2)	0	1 (2)			15 (12)	8 (14)	15 (12)	8 (14)	0	0	0	0	0	0
Single agents	0	0	0	2 (3)	0	2 (3)	0	4 (33)	0	5 (5)	0	10 (8)	0	0	1 (5)	3 (6)	1 (5)	3 (5)	0	0	0	7 (8)	0	8 (8.4)	0	4 (25)	1 (2)	6 (9)	1 (2)	10 (12)	0	0	2 (4)	2 (4)	2 (4)	2 (3)		1 (50)	1 (1)	23 (40)	1 (1)	24 (41)	0	0	0	1 (1.7)	1 (7.7)	1 (1.6)
EGFR/ALK TKI	0	0	11 (61)	0	14 (64)	0	0	0	7 (37)	1 (1)	10 (42)	1 (1)	0	0	6 (30)	0	6 (29)	0	2 (100)	0	14 (48)	0	16 (52)	0	0	1 (6)	41 (89)	0	43 (88)	1 (1)	0	0	22 (46)	2 (4)	23 (43)	2 (3)			101 (81)	6 (11)	101 (81)	6 (10)	0	0	4 (33.3)	0	4 (30.8)	0
Other- anti NSCLC agents	0	0	0	0	0	0	0	0	0	0	0	0	0	0	0	0	0	0	0	0	0	0	0	0	0	0	0	2 (3)	0	2 (2.5)	0	0	0	0	0	0	0	0	0	0	0	0	0	0	0	0	0	0
Second Line therapy	N=0	N=0	N= 10	N=39	N=14	N=40	N=0	N=7	N=11	N=47	N=13	N=60	N=1	N=4	N=13	N=22	N=14	N=27	N = 0	N=1	N=22	N=58	N=22	N=66	N=1	N=12	N=30	N=33	N=32	N=46	N=1	N=4	N=34	N=32	N=37	N=37	N=0	N=2	N=85	N=42	N=85	N=44	N=0	N=0	N=7	N=41	N=8	N=42
Platinum combination	0	0	5 (50)	2 (5)	7 (50)	2 (5)	0	0	4 (36)	10 (21)	5 (39)	10 (17)	0	0	3 (23)	7 (32)	3 (21)	7 (26)	0	0	8 (36)	8 (14)	8 (36)	9 (14)	1 (100)	3 (25)	13 (43.3)	5 (15.2)	14 (43.8)	8 (17.4)	0	0	9 (27)	1 (3)	9 (24)	1 (3)	1 (7.1)	1 (50)	40 (47)	3 (7)	40 (47)	4 (9)	0	0	2 (28.6)	9 (22.0)	2 (25)	9 (21.4)
non-platinum combination	0	0	0	0	0	0	0	3 (43)	2 (18)	2 (4)	2 (15)	6 (10)	0	0	1 (8)	2 (9)	1 (7)	2 (7)	0	0	0	0	0	1 (2)	0		0	1 (3)	0	1 (2.2)	0	0	0	0	0	0	6 (42.9)		8 (9)	10 (24)	8 (9)	10 (23)	0	0	0	1 (2.4)	0	2 (4.8)
Single agents	0	0	1 (10)	21 (54)	1 (7)	22 (55)	0	1 (14)	1 (9)	22 (47)	1 (8)	28 (47)	0	4 (100)	3 (23)	7 (32)	3 (21)	12 (44)	0	0	3 (14)	44 (76)	3 (14)	47 (71)	0	7 (58.3)	2 (6.7)	24 (72.7)	2 (6.3)	31 (67.4)	1 (100)	3 (75)	9 (27)	13 (41)	11 (30)	16 (43)	5 (35.7)	0	29 (34)	14 (33)	29 (34)	14 (32)	0	0	4 (57.1)	27 (65.9)	5 (62.5)	27 (64.3)
EGFR/ALK TKI	0	0	4 (40)	16 (41)	6 (43)	16 (40)	0	3 (43)	4 (36)	11 (23)	4 (31)	14 (23)	1 (100)	0	6 (46)	6 (27)	7 (50)	6 (22)	0	1 (100)	11 (50)	6 (10)	11 (50)	9 (14)	0		15 (50)	3 (9.1)	16 (50)	4 (8.7)	0	1 (25)	16 (47)	18 (56)	17 (46)	20 (54)	2 (14.3)	1 (50)	8 (9)	15 (36)	8 (9)	16 (36)	0	0	1 (14.3)	4 (9.8)	1 (12.5)	4 (9.5)
Other- anti NSCLC agents	0	0	0	0	0	0	0	0	0	2 (4)	1 (8)	2 (3)	0	0	0	0	0	0	0	0	0	0	0	0	0	2 (16.7)	0	0	0	2 (4.4)	0	0	0	0	0	0	0	0	0	0	0	0	0	0	0	0	0	0
Third Line therapy	N=0	N=0	N=3	N=21	N=5	N=22	N=0	N=5	N=4	N=26	N=5	N=33	N=1	N=2	N=7	N=10	N=8	N=12	N = 0	N=1	N=13	N=20	N=13	N=26	N=1	N=9	N=15	N=16	N=17	N=26	N=0	N=2	N=18	N=22	N=20	N=0	N=0	N=1	N=54	N=23	N=54	N=24	N=0	N=0	N=3	N=17	N=3	N= 17
Platinum combination	0	0	0	0	0	0	0	1 (20)	2 (50)	3 (12)	2 (40)	4 (12)	0	0	5 (71)	2 (20)	5 (63)	2 (17)	0	1 (100)	3 (23)	2 (10)	3 (23)	3 (12)	0	0	3 (20)	6 (38)	4 (24)	6 (23)	0	0	0	2 (9)	1 (5)	2 (8)	0	0	2 (4)	0	2 (4)	0	0	0	0	3 (17.7)	0	3 (17.7)
non-platinum combination	0	0	0	0	0	0	0	0	1 (25)	4 (15)	1 (20)	5 (16)	0	0	0	2 (20)	0	2 (17)	0	0	2 (15)	0	2 (15)	0	1 (100)	0	2 (13)	7 (44)	3 (18)	0	0	0	1 (6)	1 (5)	0	1 (4)	0	0	4 (7)	5 (21)	4 (7)	5 (21)	0	0	1 (33.3)	2 (11.8)	1 (33.3)	2 (11.8)
Single agents	0	0	2 (67)	13 (62)	4 (80)	13 (59)	0	2 (40)	0	8 (31)	1 (20)	11 (33)	1 (100)	1 (50)	1 (14)	6 (60)	2 (25)	7 (58)	0	0	2 (15)	9 (45)	2 (15)	11 (42)	0	4 (44)	1 (7)	0	1 (6)	12 (46)	0	1 (50)	12 (67)	13 (59)	13 (65)	15 (60)	0	0	14 (26)	9 (39)	14 (26)	9 (38)	0	0	1 (33.3)	7 (41.2)	1 (33.3)	7 (41.2)
EGFR/ALK TKI	0	0	1 (33)	7 (33)	1 (20)	8 (36)	0	2 (40)	1 (25)	11 (42)	1 (20)	13 (39)	0	1 (50)	1 (14)	0	1 (13)	1 (8)	0	0	2 (15)	9 (45)	2 (15)	12 (46)	0	1 (11)	9 (60)	3 (19)	9 (53)	4 (15)	0	1 (50)	5 (28)	6 (27)	6 (30)	7 (28)	0	1 (100)	34 (63)	8 (35)	34 (63)	9 (38)	0	0	1 (33.3)	5 (29.4)	1 (33.3)	5 (29.4)
other NSCLC drugs	0	0	0	1 (5)	0	1 (5)	0	0	0	0	0	0	0	0	0	0	0	0	0	0	4 (31)	0	4 (31)	0	0	4 (44)	0	0	0	4 (15)	0	0	0	0	0	0	0	0	0	1 (4)	0	1 (4)	0	0	0	0	0	0
Among patients who did not get a test	Squamous		Nonsquamous		Overall		Squamous		Nonsquamous		Overall		Squamous		Nonsquamous		Overall		Squamous		Nonsquamous		Overall		Squamous		Nonsquamous		Overall		Squamous		Nonsquamous		Overall		Squamous		Nonsquamous		Overall		Squamous		Nonsquamous		Overall
First line therapy	N=41		N=42		N=85		N=19		N=21		N=48		N=22		N=37		N=61		N=27		N=46		N=82		N=26		N=19		N=45		N=23		N=12		N=36		N=14		N=18		N=32		N=33		N=61		N=100
Platinum combination	30 (73)		36 (86)		68 (80)		19 ( 100)		20 (95)		47 (98)		22 (100)		30 (81)		54 (89)		25 (93)		37 (80)		70 (85)		24 (92)		18 (95)		42 (93)		23 (100)		11 (92)		35 (97)		7 (50)		4 (22)		11 (34)		33 (100)		55 (90)		94 (94)
non-platinum combination	0		0		0		0		1 (3.4)		0		0		0		0		0		0		0		0		0		0		0		0		1 (2.6)		3 (21)		2 (11)		5 (16)		0		0		0
Single agents	11 (27)		6 (14)		17 (20)		0		1 (5)		1 (2)		0		7 (19)		7 (12)		2 (7)		9 (20)		12 (15)		2 (8)		1 (5)		3 (7)		0		1 (8)		1 (3)		4 (29)		8 (44)		12 (38)		0		6 (10)		6 (6)
EGFR/ALK TKI	0		1 (2.3)		0		0		1 (3.5)		0		0		0		0		0		0		0		0		0		0		0		0		0		0		4 (22)		4 (13)		0		0		0
Other- anti NSCLC agents	0		0		1 (1.2)		0		0		0		0		0		0		0		0		0		0		0		0		0		0		0		0		0		0		0		0		0
Second lline therapy	N=19		N=25		N=45		N=5		N=9		N=16		N=11		N=9		N=20		N=13		N=20		N=40		N=17		N=10		N=27		N=13		N=8		N=21		N=11		N=15		N=26		N=16		N=22		N=40
Platinum combination	2 (11)		2 (8)		4 (9)		2 (40)		2 (22)		5 (31)		6 (55)		3 (33)		9 (45)		2 (15)		3 (15)		5 (13)		4 (24)		4 (40)		8 (30)		1 (8)		0		1 (5)		2 (18)		1 (7)		3 (12)		1 (6.3)		2 (8.7)		3 (7.3)
non-platinum combination	0		0		0		1 (20)		0		1 (6)		0		2 (22)		2 (10)		0		0		0		0		1 (10)		1 (4)		3 (23)		0		3 (14)		3 (27)		9 (60)		12 (46)		0		0		0
Single agents	15 (79)		14 (56)		29 (64)		2 (40)		6 (67)		9 (56)		5 (46)		4 (44)		9 (45)		9 (69)		13 (65)		27 (68)		11 (65)		5 (50)		16 (59)		3 (23)		2 (25)		5 (24)		6 (55)		1 (7)		7 (27)		14 (88)		19 (86)		35 (88)
EGFR/ALK TKI	2 (11)		9 (36)		12 (27)		0		1 (11)		1 (6)		0		1 (9.1)		1 (4.4)		2 (15)		4 (20)		8 (20)		2 (12)		0		2 (7)		6 (46)		6 (75)		12 (57)		0		4 (27)		4 (15)		1 (6)		1 (5)		2 (5)
Other- anti NSCLC agents	0		0		0		0		0		0		0		0		0		0		0		0		0		0		0		0		0		0		0		0		0		0		0		0
Third Line therapy	N=8		N=7		N=16		N=2		N=4		N=6		N=4		N=5		N=9		N=3		N=7		N=13		N=5		N=5		N=10		N=8		N=6		N=14		N=6		N=7		N=13		N=6		N=1		N=9
Platinum combination	0		1 (14)		1 (6)		0		1 (25)		1 (17)		1 (25)		0		1 (11)		0		1 (14)		2 (15)		1 (20)		1 (20)		2 (20)		1 (13)		1 (17)		2 (14)		1 (17)		0		1 (8)		1 (17)		0		1 (11)
non-platinum combination	0		0		0		0		1 (25)		1 (17)		1 (25)		0		1 (11)		1 (33)		1 (14)		2 (15)		1 (20)		1 (20)		2 (20)		1 (13)		1 (17)		2 (14)		0		4 (57)		4 (31)		0		0		0
Single agents	8 (100)		4 (57)		13 (81)		1 (50)		2 (50)		3 (50)		1 (25)		3 (60)		4 (44)		1 (33)		3 (43)		4 (31)		2 (40)		3 (60)		5 (50)		3 (38)		3 (50)		6 (43)		2 (33)		1 (14)		3 (23)		4 (67)		0		6 (67)
EGFR/ALK TKI	0		2 (29)		2 (13)		1 (50)		0		1 (17)		0		2 (40)		2 (22)		1 (33)		2 (29)		5 (39)		1 (11.1)		0		4 (15.4)		3 (38)		1 (17)		4 (29)		3 (50)		2 (29)		5 (39)		1 (17)		1 (100)		2 (22)
Other- anti NSCLC agents	0		0		0		0		0		0		0		0		0		0		0		0		1 (20)		0		1 (10)		0		0		0		0		0		0		0		0		0
ALK, anaplastic lymphoma kinase; EGFR, epidermal growth factor receptor; NSCLC, non-small cell lung cancer; TKI, tyrosine kinase inhibitor; unk unknown.
